# Supplementary material
Source: MDPI journal article supplement (https://www.mdpi.com/2072-4292/9/12/1283)
Supplement: s1 [file s1]

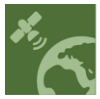

1

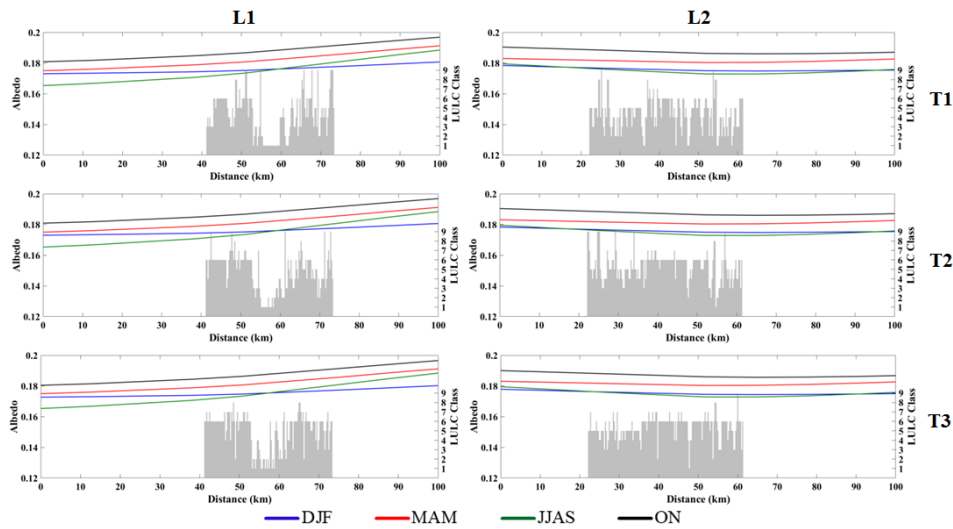

2

3 Figure S1. Spatial profile of albedo calculated from ERA-Interim dataset (0.125° spatial  
 4 resolution), varying with LULC classes for NE-SW (L1) and NW-SE (L2) transect for various  
 5 seasons during time periods- 1991-1999 (T1), 2000-2008 (T2), and 2009-2016 (T3). Representation of  
 6 LULC classes is as follows: 1- Dense Forest, 2- Open Forest, 3- Scrubs/Degraded Forest, 4-  
 7 Plantations, 5- Cultivable Area, 6- Built-up Area, 7- Road Rail Network, 8- River/ Waterbody, and 9-  
 8 Wasteland.

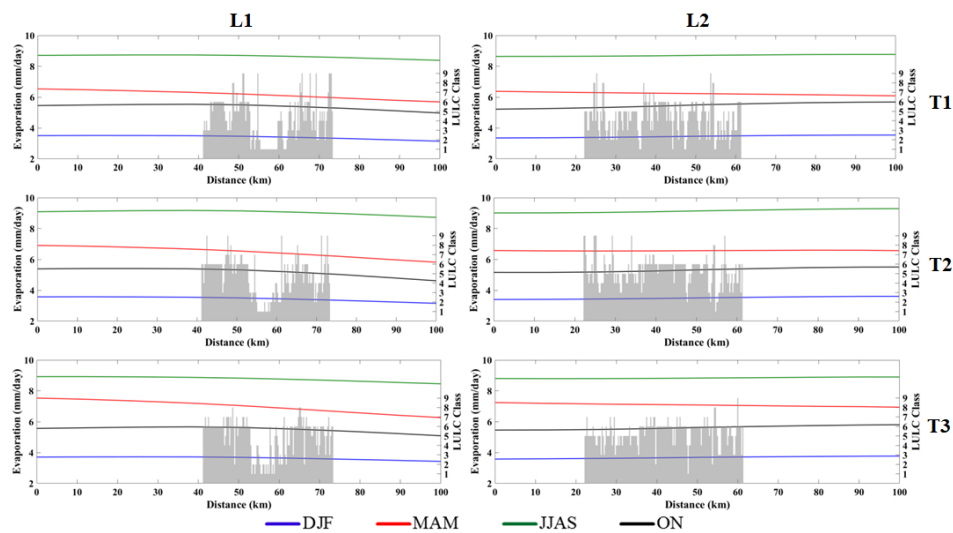

9

10 Figure S2. Same as Figure S1, but for evaporation (mm/day).

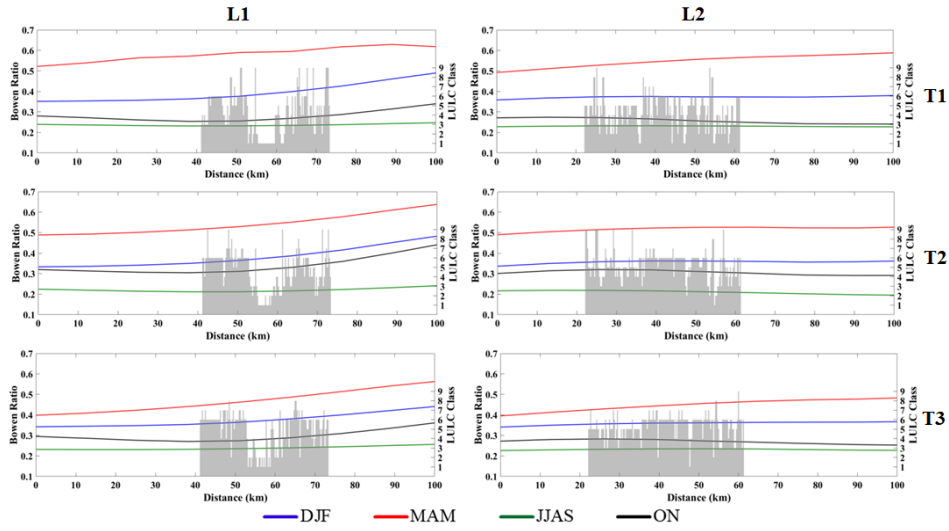

11

12

Figure S3. Same as Figure S1, but for Bowen ratio.

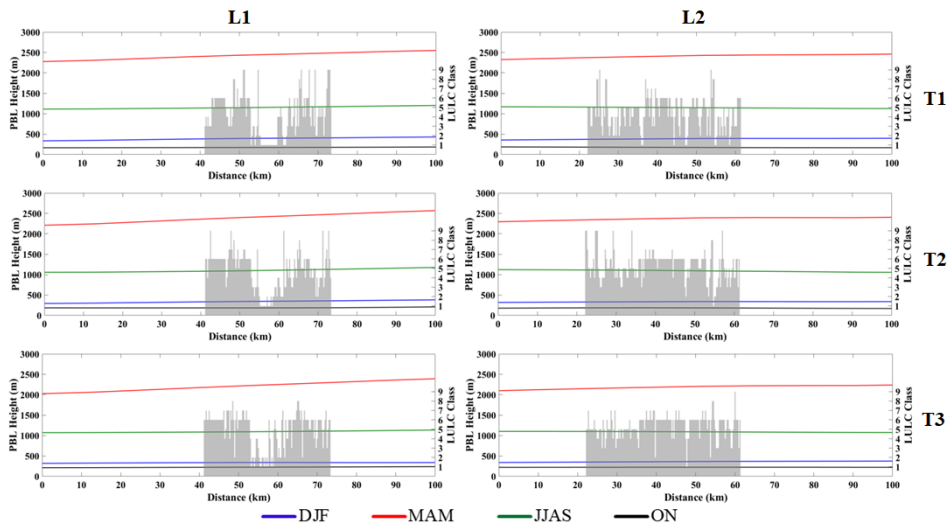

13

14

Figure S4. Same as Figure S1, but for PBL height (m).
